# Supplementary material for: Emission behaviors of unsymmetrical 1,3-diaryl-β-diketones: A model perfectly disclosing the effect of molecular conformation on luminescence of organic solids
Source: PubMed Central journal article supplement (PMC4360484; doi:10.1038/srep09140), 2015-03-16
Supplement: srep09140-s1.pdf [file srep09140-s1.pdf]

## Supplementary Information for:

### **Emission behaviors of unsymmetrical 1,3-diaryl- $\beta$ -diketones: A model perfectly disclosing the effect of molecular conformation on luminescence of organic solids**

*Xiao Cheng, Feng Li, Shenghua Han, Yufei Zhang, Chuanjun Jiao, Jinbei Wei, Kaiqi Ye, Yue Wang and Hongyu Zhang\**

*State Key Laboratory of Supramolecular Structure and Materials, College of Chemistry, Jilin University, Qianjin Avenue 2699, Changchun 130012, P. R. China*

*E-mail: [hongyuzhang@jlu.edu.cn](mailto:hongyuzhang@jlu.edu.cn)*

#### **Table of contents**

|                                                          |         |
|----------------------------------------------------------|---------|
| Part 1. Synthetic Procedure and Spectra                  | S2–S5   |
| Part 2. Molecular Packing Structures                     | S6      |
| Part 3. Theoretical Calculations                         | S7      |
| Part 4. Threshold Values and Fluorescent Microphotograph | S8      |
| Part 5. Emission Polarization and Gain Coefficient       | S9      |
| Part 6. Crystal Data and Structure Refinement            | S10–S11 |
| Part 7. $^1\text{H}$ and $^{13}\text{C}$ NMR Spectra     | S12–S19 |

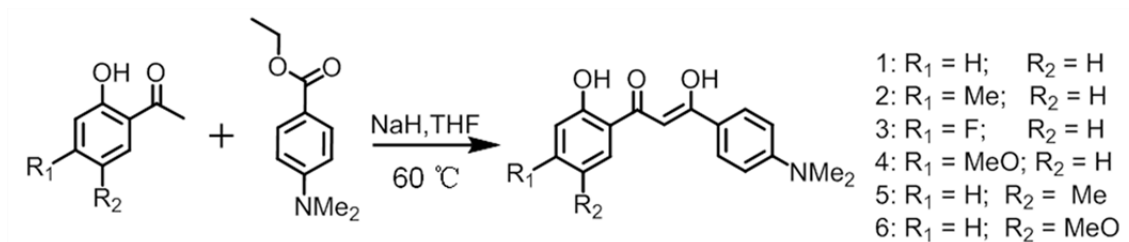

**Figure S1.** Synthetic procedure of complexes 1–6.

*3-Hydroxy-3-(4-dimethylaminophenyl)-1-(2-hydroxy-4-methylphenyl)-propenone, 2:*

Yield: 60%. <sup>1</sup>H NMR (500 MHz, CDCl<sub>3</sub>, δ): enol tautomer (~66%) 15.94 (s, 1H), 12.29 (s, 1H), 7.92 (d, *J* = 9.5 Hz, 1H), 7.86 (d, *J* = 2.0 Hz, 2H), 6.79 (s, 1H), 6.71 (m, 3H), 6.68 (s, 1H), 3.08 (s, 6H), 2.35 (s, 3H); diketone tautomer (~34%) 12.08 (s, 1H), 7.74 (d, *J* = 8.0 Hz, 2H), 7.63 (d, *J* = 8.0 Hz, 2H), 6.77 (s, 1H), 6.71 (m, 1H), 6.66 (m, 2H), 4.50 (s, 2H), 3.07 (s, 6H), 2.33 (s, 3H). <sup>13</sup>C NMR (125 MHz, CDCl<sub>3</sub>, δ): 200.25, 193.32, 190.91, 178.35, 162.92, 162.19, 153.85, 153.23, 148.51, 146.27, 131.25, 131.18, 128.71, 128.03, 120.52, 120.14, 118.73, 118.42, 116.94, 111.21, 110.76, 89.51, 50.04, 40.06, 40.01, 21.99, 21.78. MS *m/z*: [M]<sup>+</sup> calcd for C<sub>18</sub>H<sub>19</sub>NO<sub>3</sub>: 297.14; found: 296.95. Anal. calcd (%) for C<sub>18</sub>H<sub>19</sub>NO<sub>3</sub>: C, 72.71; H, 6.44; N, 4.71; found: C, 73.00; H, 6.37; N, 4.63.

*3-Hydroxy-3-(4-dimethylaminophenyl)-1-(2-hydroxy-4-fluorophenyl)-propenone, 3:*

Yield: 62%. <sup>1</sup>H NMR (500 MHz, CDCl<sub>3</sub>, δ): enol tautomer (~72%) 15.80 (s, 1H), 12.69 (d, *J* = 1.5 Hz, 1H), 7.18 (s, 1H), 7.88 (m, 2H), 7.74 (dd, *J* = 9.0, 6.5 Hz, 1H), 6.66 (m, 5H), 3.08 (s, 6H); diketone tautomer (~28%) 12.40 (d, *J* = 1.5 Hz, 1H), 7.88 (m, 2H), 6.66 (m, 5H), 4.49 (s, 2H), 3.08 (s, 6H). <sup>13</sup>C NMR (125 MHz, CDCl<sub>3</sub>, δ): 199.81, 192.41, 190.43, 178.70, 167.69, 165.67, 164.48, 164.38, 153.94, 153.29, 134.00, 133.91, 131.29, 130.21, 130.12, 128.84, 116.20, 116.18, 111.32, 110.79,

107.00, 106.82, 105.20, 105.01, 89.41, 50.26, 40.11, 40.02. MS  $m/z$ :  $[M]^+$  calcd for  $C_{17}H_{16}FNO_3$ : 301.18; found: 301.11. Anal. calcd (%) for  $C_{17}H_{16}FNO_3$ : C, 67.76; H, 5.35; N, 4.65; found: C, 68.00; H, 5.25; N, 4.60.

*3-Hydroxy-3-(4-dimethylaminophenyl)-1-(2-hydroxy-4-methoxyphenyl)-propenone, 4:*

Yield: 64%.  $^1H$  NMR (500 MHz,  $CDCl_3$ ,  $\delta$ ): enol tautomer (~59%) 15.76 (s, 1H), 12.76 (s, 1H), 7.84 (d,  $J = 8.5$ Hz, 2H), 7.67 (d,  $J = 8.5$ Hz, 1H), 7.73 (dd,  $J = 7.5$ Hz, 2H), 6.60 (s, 1H), 6.45 (m, 2H), 3.84 (s, 3H), 3.07 (s, 6H); diketone tautomer (~41%) 12.55 (s, 1H), 7.93 (d,  $J = 9.0$ Hz, 2H), 7.78 (d,  $J = 9.0$ Hz, 1H), 6.45 (m, 1H), 6.40 (m, 1H), 3.82 (s, 3H), 3.07 (s, 6H).  $^{13}C$  NMR (125 MHz,  $CDCl_3$ ,  $\delta$ ): 198.74, 192.81, 190.98, 177.37, 166.43, 165.73, 165.22, 164.80, 153.82, 133.03, 131.30, 129.70, 128.56, 124.21, 111.42, 110.77, 107.95, 107.55, 101.32, 100.90, 89.29, 55.60, 55.49, 50.05, 40.19, 40.03. MS  $m/z$ :  $[M]^+$  calcd for  $C_{18}H_{19}FNO_4$ : 313.13; found: 313.26. Anal. calcd (%) for  $C_{18}H_{19}FNO_4$ : C, 69.00; H, 6.11; N, 4.47; found: C, 69.39; H, 5.96; N, 4.40.

*3-Hydroxy-3-(4-dimethylaminophenyl)-1-(2-hydroxy-5-methoxyphenyl)-propenone, 6:*

Yield: 52%.  $^1H$  NMR (500 MHz,  $CDCl_3$ ,  $\delta$ ): enol tautomer (~59%) 15.76 (s, 1H), 12.76 (s, 1H), 7.85 (d,  $J = 2.0$ Hz, 2H), 7.67 (d,  $J = 8.5$ Hz, 1H), 7.74 (dd,  $J = 9.0$ Hz, 2H), 6.60 (s, 1H), 6.44 (m, 2H), 3.84 (s, 3H), 3.08 (s, 6H); diketone tautomer (~41%) 12.55 (s, 1H), 7.93 (d,  $J = 9.5$ Hz, 2H), 7.83 (d,  $J = 2.0$ Hz, 1H), 6.66 (d,  $J = 9.0$ Hz, 2H), 6.44 (m, 1H), 6.40 (d,  $J = 2.5$ Hz, 1H), 3.82 (s, 3H), 3.07 (s, 6H).  $^{13}C$  NMR (125 MHz,  $CDCl_3$ ,  $\delta$ ): 198.77, 192.77, 190.99, 177.41, 166.42, 165.72, 165.20, 164.79, 153.82, 153.03, 133.03, 131.28, 129.70, 128.56, 124.18, 120.37, 113.95, 112.86, 111.31,

110.75, 107.94, 107.52, 101.33, 100.91, 89.24, 55.60, 55.94, 50.00, 40.12, 40.01. MS

$m/z$ :  $[M]^+$  calcd for  $C_{18}H_{19}FNO_4$ : 313.13; found: 313.31. Anal. calcd (%) for

$C_{18}H_{19}FNO_4$ : C, 69.00; H, 6.11; N, 4.47; found: C, 69.41; H, 5.94; N, 4.41.

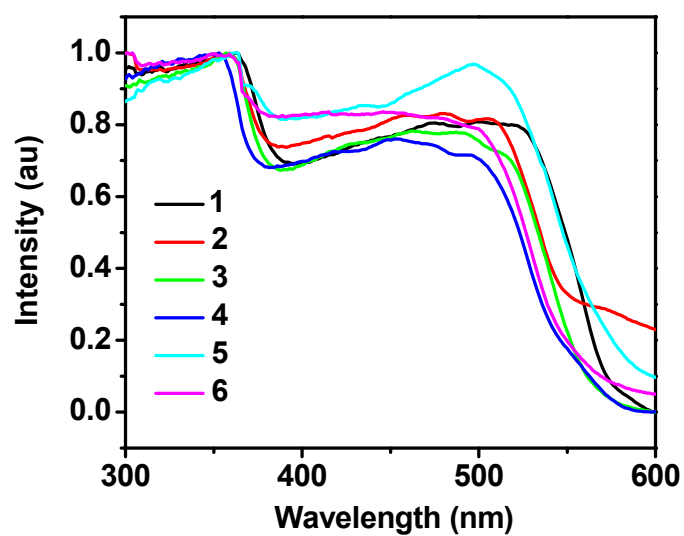

**Figure S2.** Absorption spectra of crystals for compounds 1–6.

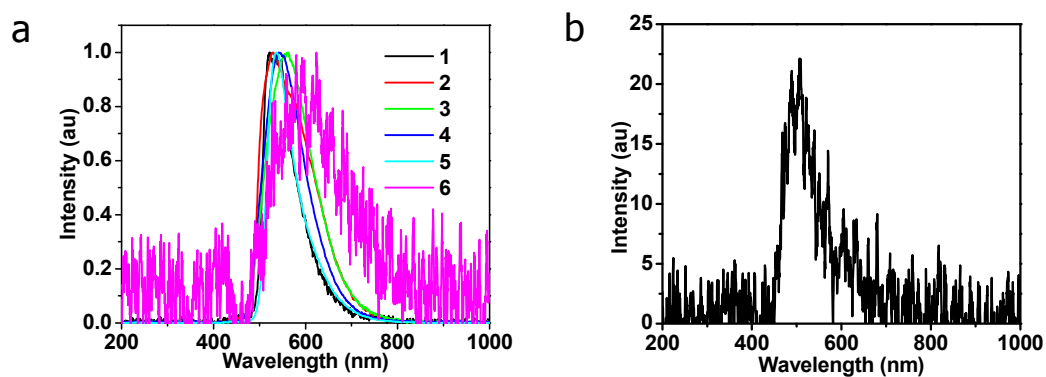

**Figure S3.** (a) Photoluminescent spectra of thin films for compounds 1–6; (b)

Photoluminescent spectra of thin film for compound 1 in PMMA.

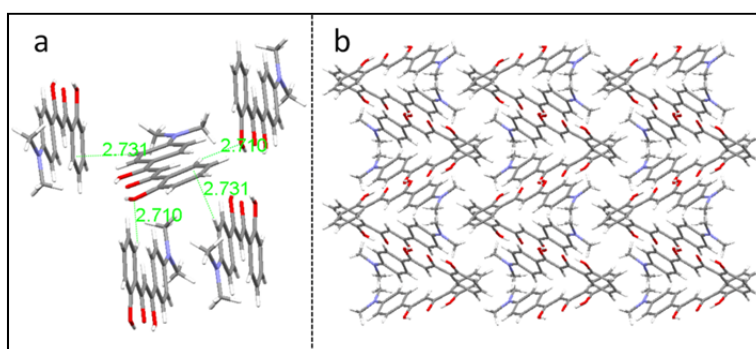

**Figure S4.** (a) Two types of intermolecular interaction between the adjacent molecules ( $\text{\AA}$ ); (b) cross-shape network structures of crystal **1**.

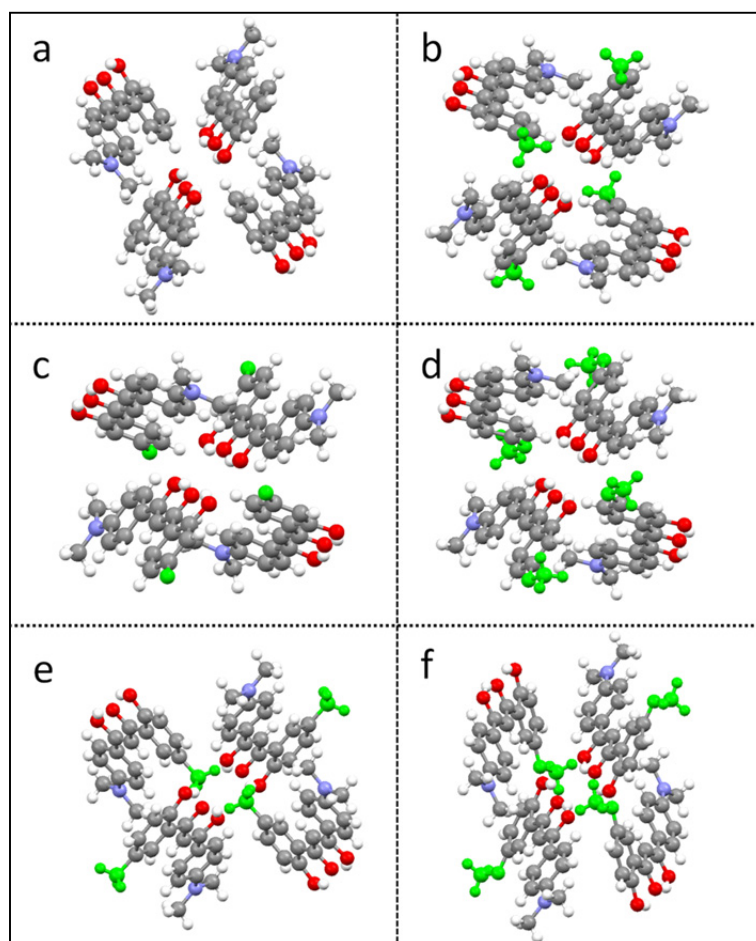

**Figure S5.** Molecular packing structures of crystals **1–6** (a–f) with different substituents (marked in green color).

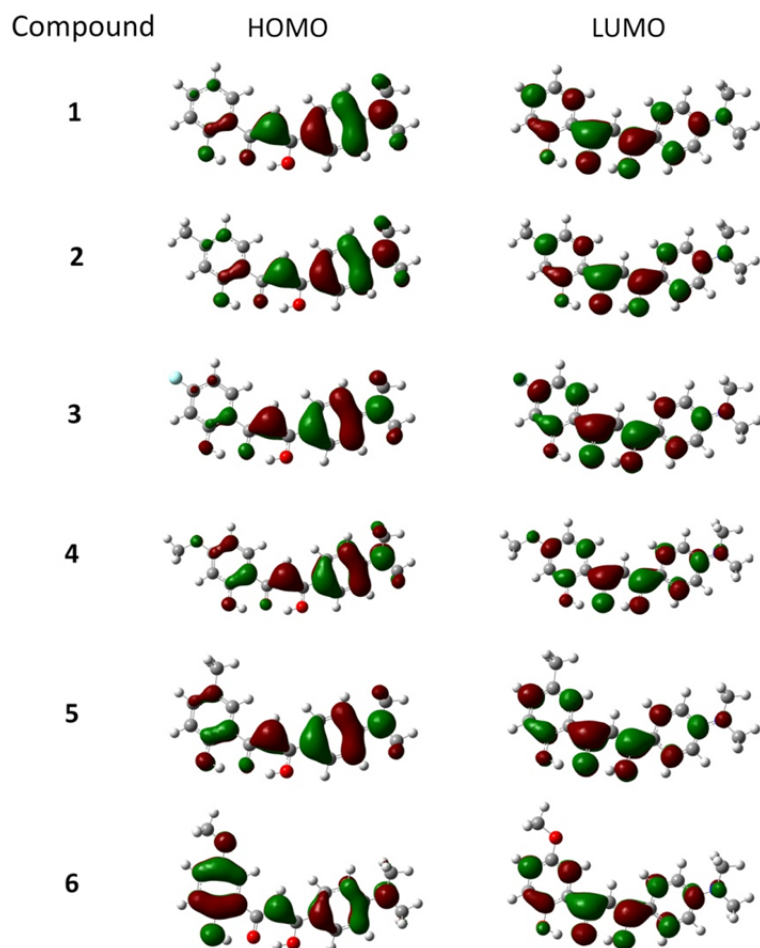

**Figure S6.** Theoretical calculations of HOMO, LUMO distributions on the ground state for compounds 1–6.

**Table S1.** HOMO and LUMO values calculated for 1–6.

|                     | 1     | 2     | 3     | 4     | 5     | 6     |
|---------------------|-------|-------|-------|-------|-------|-------|
| HOMO, eV            | -6.66 | -6.59 | -6.70 | -6.53 | -6.60 | -6.52 |
| LUMO, eV            | -0.65 | -0.58 | -0.71 | -0.49 | -0.62 | -0.64 |
| E <sub>g</sub> , eV | 6.01  | 6.01  | 5.99  | 6.04  | 5.98  | 5.98  |

**Table S2.** Threshold of ASE for different organic crystals

| Compound                                 | 1  | 2  | 3  | 4   | 5  | AC5<br>(Ref 45) | BP1T<br>(Ref 45) | BP3T<br>(Ref 46) | BOXD-4<br>(Ref 47) |
|------------------------------------------|----|----|----|-----|----|-----------------|------------------|------------------|--------------------|
| Threshold value<br>(kW/cm <sup>2</sup> ) | 39 | 71 | 38 | 109 | 46 | 84              | 54               | < 260            | 20                 |

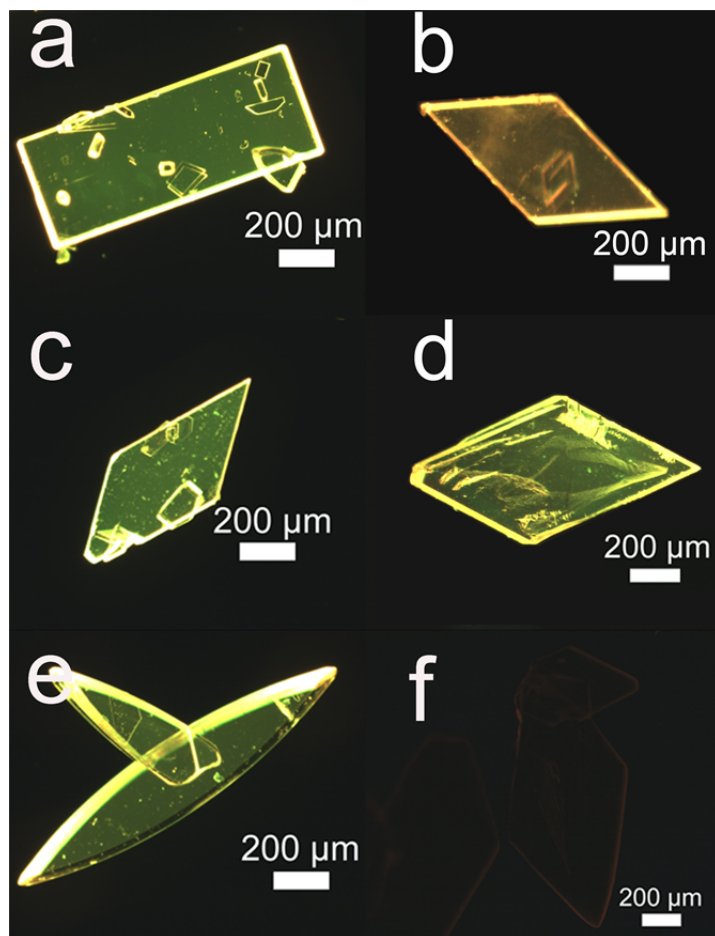

Figure S7. Fluorescent microphotograph of crystals for compounds 1–6.



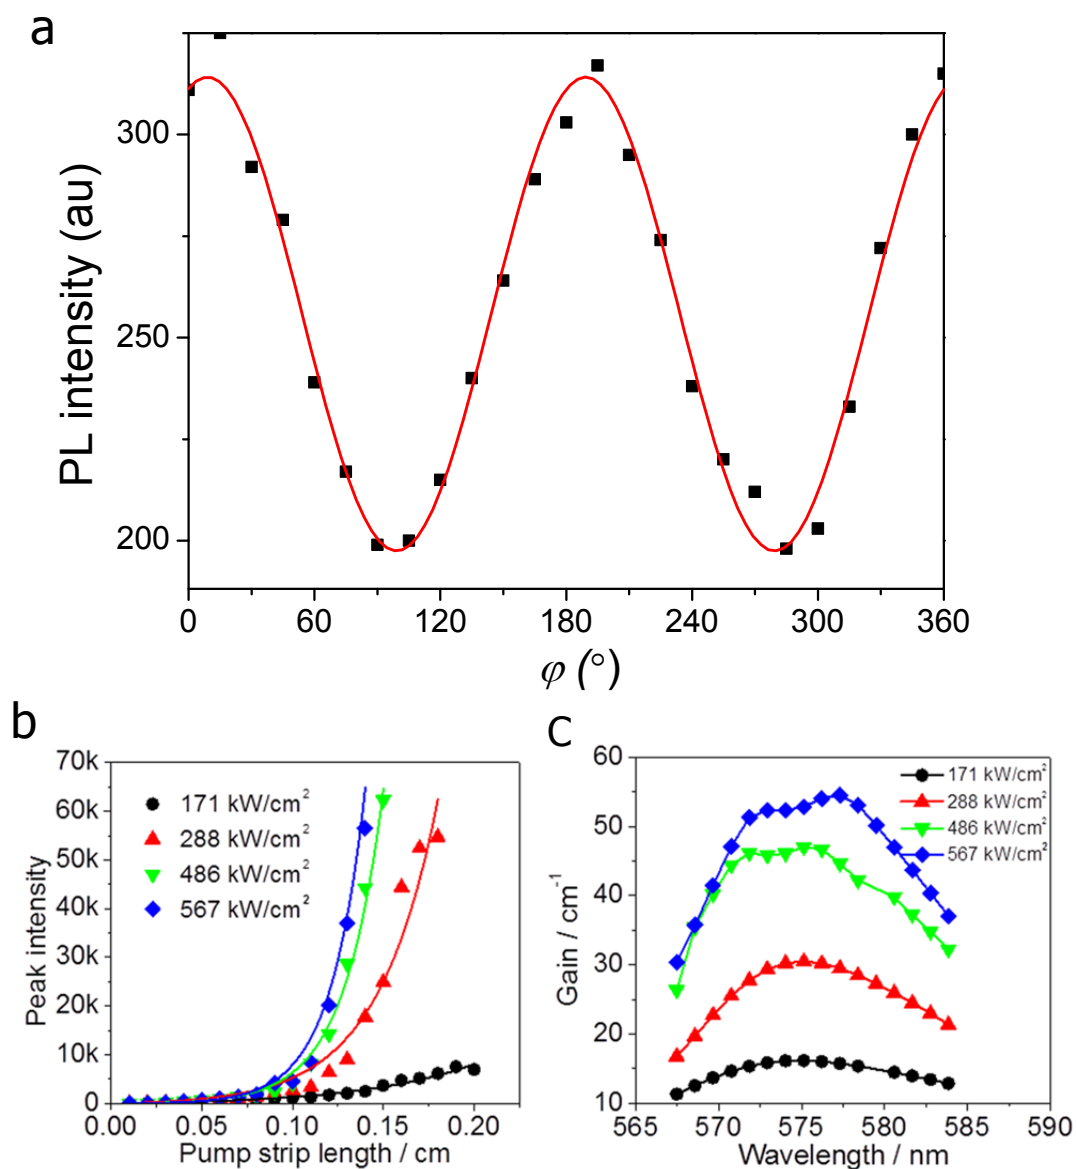

**Figure S8.** (a) Dependence of the intensity of polarized light from crystal **1** on the relative polarization angle  $\phi$  at the energy of pumping laser about  $200 \mu\text{J}\cdot\text{pulse}^{-1}\cdot\text{cm}^{-2}$ ; (b) The peak intensity of PL spectra as a function of the pump stripe length at different pump energies; (c) The net gain coefficient as a function of wavelength at different pump intensities.

**Table S3.** Crystal data and structure refinement for **1–6**.

| Table S3-1. Crystal data and structure refinement for <b>1, 2</b> and <b>3</b> . |                                                  |                                                  |                                                    |
|----------------------------------------------------------------------------------|--------------------------------------------------|--------------------------------------------------|----------------------------------------------------|
| Identification code                                                              | <b>1</b>                                         | <b>2</b>                                         | <b>3</b>                                           |
| Empirical formula                                                                | C <sub>17</sub> H <sub>17</sub> N O <sub>3</sub> | C <sub>18</sub> H <sub>19</sub> N O <sub>3</sub> | C <sub>17</sub> H <sub>16</sub> F N O <sub>3</sub> |
| Formula weight                                                                   | 283.32                                           | 297.34                                           | 301.31                                             |
| Temperature (K)                                                                  | 293(2)                                           | 293(2)                                           | 293(2)                                             |
| Wavelength (Å)                                                                   | 0.71073                                          | 0.71073                                          | 0.71073                                            |
| Crystal system, space group                                                      | Monoclinic, P2(1)/c                              | Monoclinic, P2(1)/n                              | Monoclinic, P2(1)/n                                |
| Unit cell dimensions                                                             | a = 11.877(2) Å                                  | a = 11.795(2) Å                                  | a = 11.957(2) Å                                    |
|                                                                                  | b = 10.491(2) Å                                  | b = 12.023(2) Å                                  | b = 10.726(2) Å                                    |
|                                                                                  | c = 12.835(3) Å                                  | c = 12.097(2) Å                                  | c = 12.789(3) Å                                    |
|                                                                                  | alpha = 90 deg.                                  | alpha = 90 deg.                                  | alpha = 90 deg.                                    |
|                                                                                  | beta = 117.51(3) deg.                            | beta = 115.79(3) deg.                            | beta = 117.80(3) deg.                              |
|                                                                                  | gamma = 90 deg.                                  | gamma = 90 deg.                                  | gamma = 90 deg.                                    |
| Volume (Å <sup>3</sup> )                                                         | 1418.5(5)                                        | 1544.6(5)                                        | 1450.9(5)                                          |
| Z, Calculated density (mg/m <sup>3</sup> )                                       | 4, 1.327                                         | 4, 1.279                                         | 4, 1.379                                           |
| Absorption coefficient (mm <sup>-1</sup> )                                       | 0.091                                            | 0.087                                            | 0.103                                              |
| F(000)                                                                           | 600                                              | 632                                              | 632                                                |
| Crystal size, mm                                                                 | 0.49 × 0.41 × 0.31                               | 0.41 × 0.37 × 0.35                               | 0.50 × 0.33 × 0.12                                 |
| Theta range for data collection                                                  | 3.19 to 27.48 deg.                               | 3.21 to 27.48 deg.                               | 3.19 to 27.48 deg.                                 |
| Limiting indices                                                                 | -15<=h<=14,<br>-13<=k<=13,<br>-15<=l<=16         | -14<=h<=15, -<br>15<=k<=15, -14<=l<=15           | -15<=h<=15, -<br>13<=k<=13, -16<=l<=16             |
| Reflections collected / unique                                                   | 13518 / 3249<br>[R(int) = 0.0370]                | 14815 / 3526<br>[R(int) = 0.0396]                | 13714 / 3302<br>[R(int) = 0.0601]                  |
| Completeness to theta = 27.48                                                    | 99.60%                                           | 99.20%                                           | 99.40%                                             |
| Max. and min. transmission                                                       | 0.9726 and 0.9564                                | 0.9702 and 0.9648                                | 0.9882 and 0.9504                                  |
| Refinement method                                                                | Full-matrix least-squares on F <sup>2</sup>      |                                                  |                                                    |
| Data / restraints / parameters                                                   | 3249 / 0 / 195                                   | 3526 / 0 / 204                                   | 3302 / 0 / 263                                     |
| Goodness-of-fit on F <sup>2</sup>                                                | 1.063                                            | 1.038                                            | 0.778                                              |
| Final R indices [I > 2sigma(I)]                                                  | R1 = 0.0470,<br>wR2 = 0.1287                     | R1 = 0.0487,<br>wR2 = 0.1314                     | R1 = 0.0402,<br>wR2 = 0.0918                       |
| R indices (all data)                                                             | R1 = 0.0647,<br>wR2 = 0.1389                     | R1 = 0.0797,<br>wR2 = 0.1453                     | R1 = 0.0960,<br>wR2 = 0.1238                       |
| Largest diff. peak and hole                                                      | 0.194 and -0.232 e. Å <sup>-3</sup>              | 0.262 and -0.152 e. Å <sup>-3</sup>              | 0.268 and -0.214 e. Å <sup>-3</sup>                |

| Table S3-2. Crystal data and structure refinement for <b>4</b> , <b>5</b> and <b>6</b> . |                                                  |                                                  |                                                  |
|------------------------------------------------------------------------------------------|--------------------------------------------------|--------------------------------------------------|--------------------------------------------------|
| Identification code                                                                      | <b>4</b>                                         | <b>5</b>                                         | <b>6</b>                                         |
| Empirical formula                                                                        | C <sub>18</sub> H <sub>19</sub> N O <sub>4</sub> | C <sub>18</sub> H <sub>19</sub> N O <sub>3</sub> | C <sub>18</sub> H <sub>19</sub> N O <sub>4</sub> |
| Formula weight                                                                           | 313.34                                           | 297.34                                           | 313.34                                           |
| Temperature (K)                                                                          | 293(2)                                           | 293(2)                                           | 293(2)                                           |
| Wavelength (Å)                                                                           | 0.71073                                          | 0.71073                                          | 0.71073                                          |
| Crystal system, space group                                                              | Monoclinic, P2(1)/c                              | Monoclinic, P2(1)/n                              | Monoclinic, P2(1)/c                              |
| Unit cell dimensions                                                                     | a = 11.263(2) Å                                  | a = 10.858(2) Å                                  | a = 11.793(2) Å                                  |
|                                                                                          | b = 12.388(3) Å                                  | b = 13.738(3) Å                                  | b = 11.504(2) Å                                  |
|                                                                                          | c = 12.571(3) Å                                  | c = 10.878(2) Å                                  | c = 13.028(3) Å                                  |
|                                                                                          | alpha = 90 deg.                                  | alpha = 90 deg.                                  | alpha = 90 deg.                                  |
|                                                                                          | beta = 115.73(3) deg.                            | beta = 106.98(3) deg.                            | beta = 114.25(3) deg.                            |
|                                                                                          | gamma = 90 deg.                                  | gamma = 90 deg.                                  | gamma = 90 deg.                                  |
| Volume (Å <sup>3</sup> )                                                                 | 1580.1(6)                                        | 1552.0(5)                                        | 1611.7(6)                                        |
| Z, Calculated density (mg/m <sup>3</sup> )                                               | 4, 1.317                                         | 4, 1.273                                         | 4, 1.291                                         |
| Absorption coefficient (mm <sup>-1</sup> )                                               | 0.093                                            | 0.087                                            | 0.091                                            |
| F(000)                                                                                   | 664                                              | 632                                              | 664                                              |
| Crystal size, mm                                                                         | 0.40 × 0.35 × 0.32                               | 0.61 × 0.22 × 0.20                               | 0.45 × 0.34 × 0.11                               |
| Theta range for data collection                                                          | 3.27 to 27.47 deg.                               | 3.15 to 27.47 deg.                               | 3.16 to 27.48 deg.                               |
| Limiting indices                                                                         | -14<=h<=14,<br>-16<=k<=16,<br>-16<=l<=15         | -13<=h<=14, -17<=k<=17,<br>-14<=l<=13            | -15<=h<=15, -<br>13<=k<=14, -<br>16<=l<=16       |
| Reflections collected / unique                                                           | 15209 / 3593<br>[R(int) = 0.0391]                | 14464 / 3520<br>[R(int) = 0.0732]                | 14918 / 3673<br>[R(int) = 0.0565]                |
| Completeness to theta = 27.48                                                            | 99.20%                                           | 99.10%                                           | 99.50%                                           |
| Max. and min. transmission                                                               | 0.9707 and 0.9641                                | 0.9826 and 0.9488                                | 0.9901 and 0.9603                                |
| Refinement method                                                                        | Full-matrix least-squares on F <sup>2</sup>      |                                                  |                                                  |
| Data / restraints / parameters                                                           | 3593 / 0 / 213                                   | 3520 / 0 / 231                                   | 3673 / 0 / 208                                   |
| Goodness-of-fit on F <sup>2</sup>                                                        | 1.054                                            | 1.025                                            | 1.064                                            |
| Final R indices [I > 2sigma(I)]                                                          | R1 = 0.0470,<br>wR2 = 0.1271                     | R1 = 0.0670,<br>wR2 = 0.1429                     | R1 = 0.0614,<br>wR2 = 0.1734                     |
| R indices (all data)                                                                     | R1 = 0.0739,<br>wR2 = 0.1391                     | R1 = 0.1489,<br>wR2 = 0.1756                     | R1 = 0.1107,<br>wR2 = 0.1981                     |
| Largest diff. peak and hole                                                              | 0.194 and -0.179 e.Å <sup>-3</sup>               | 0.154 and -0.167 e.Å <sup>-3</sup>               | 0.271 and -0.243 e.Å <sup>-3</sup>               |

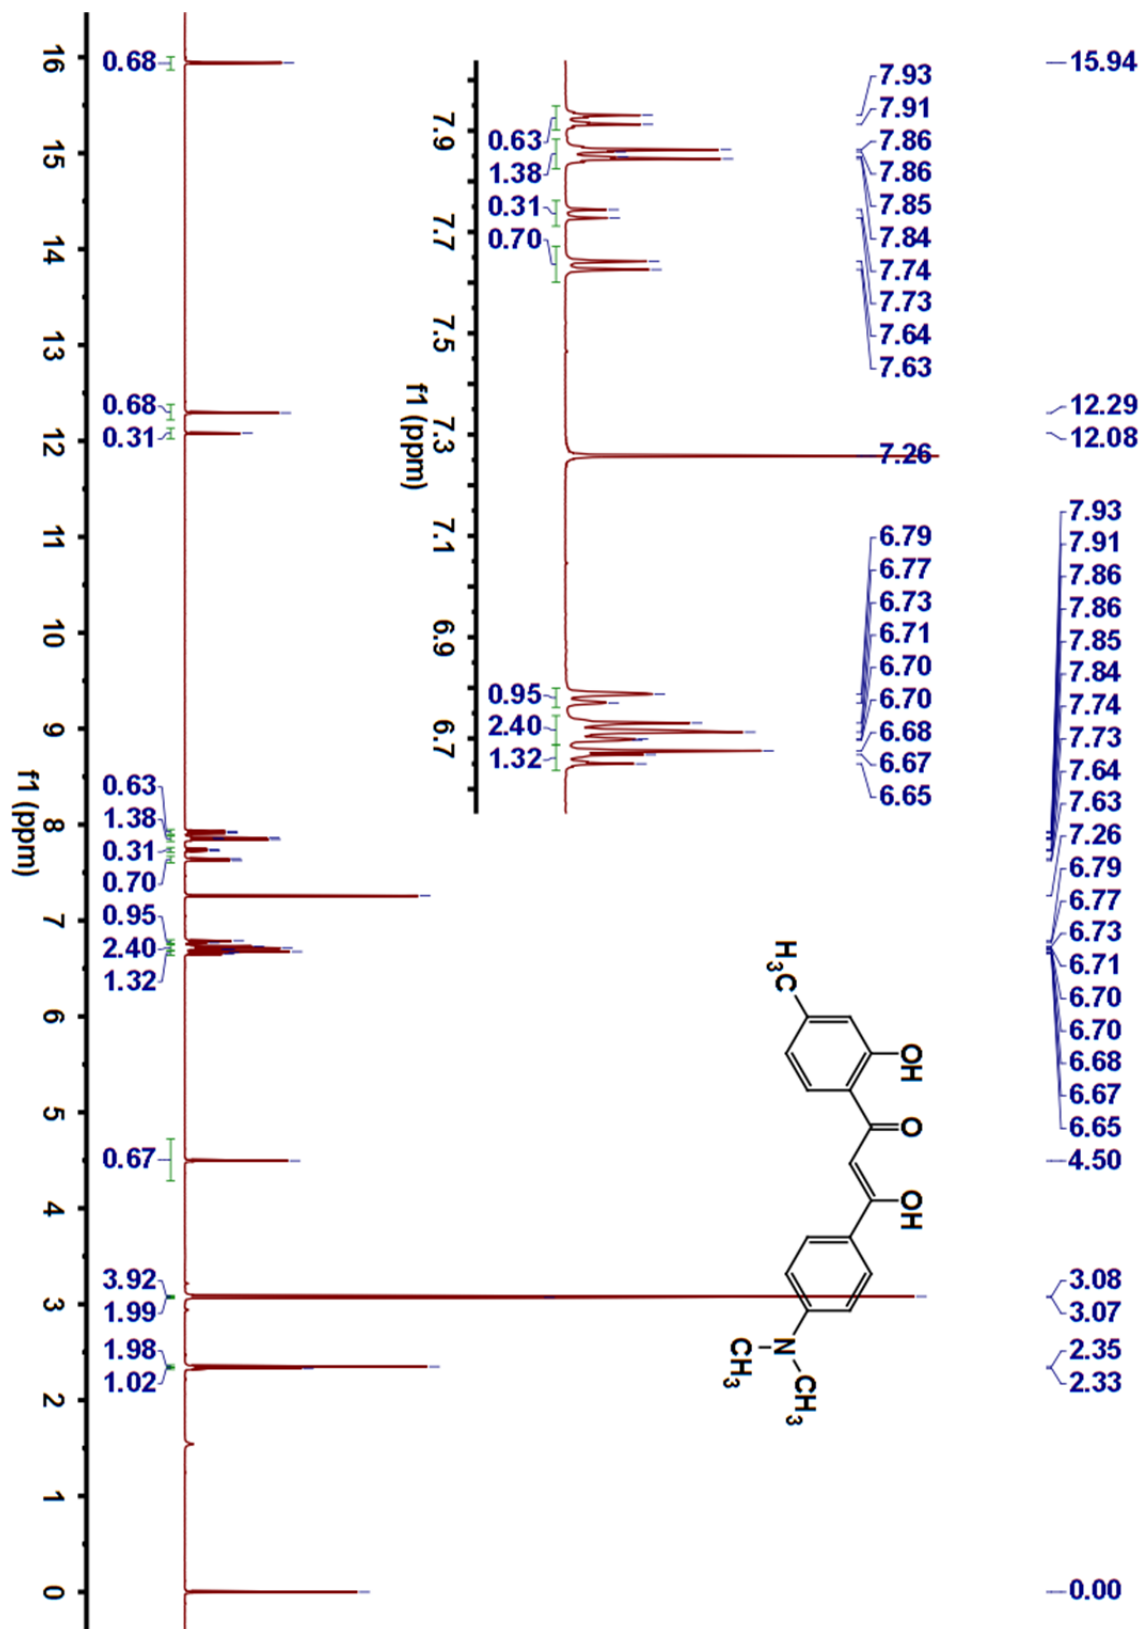

Figure S8.  $^1\text{H}$  spectra of **2** recorded in  $\text{CDCl}_3$  (500 MHz).

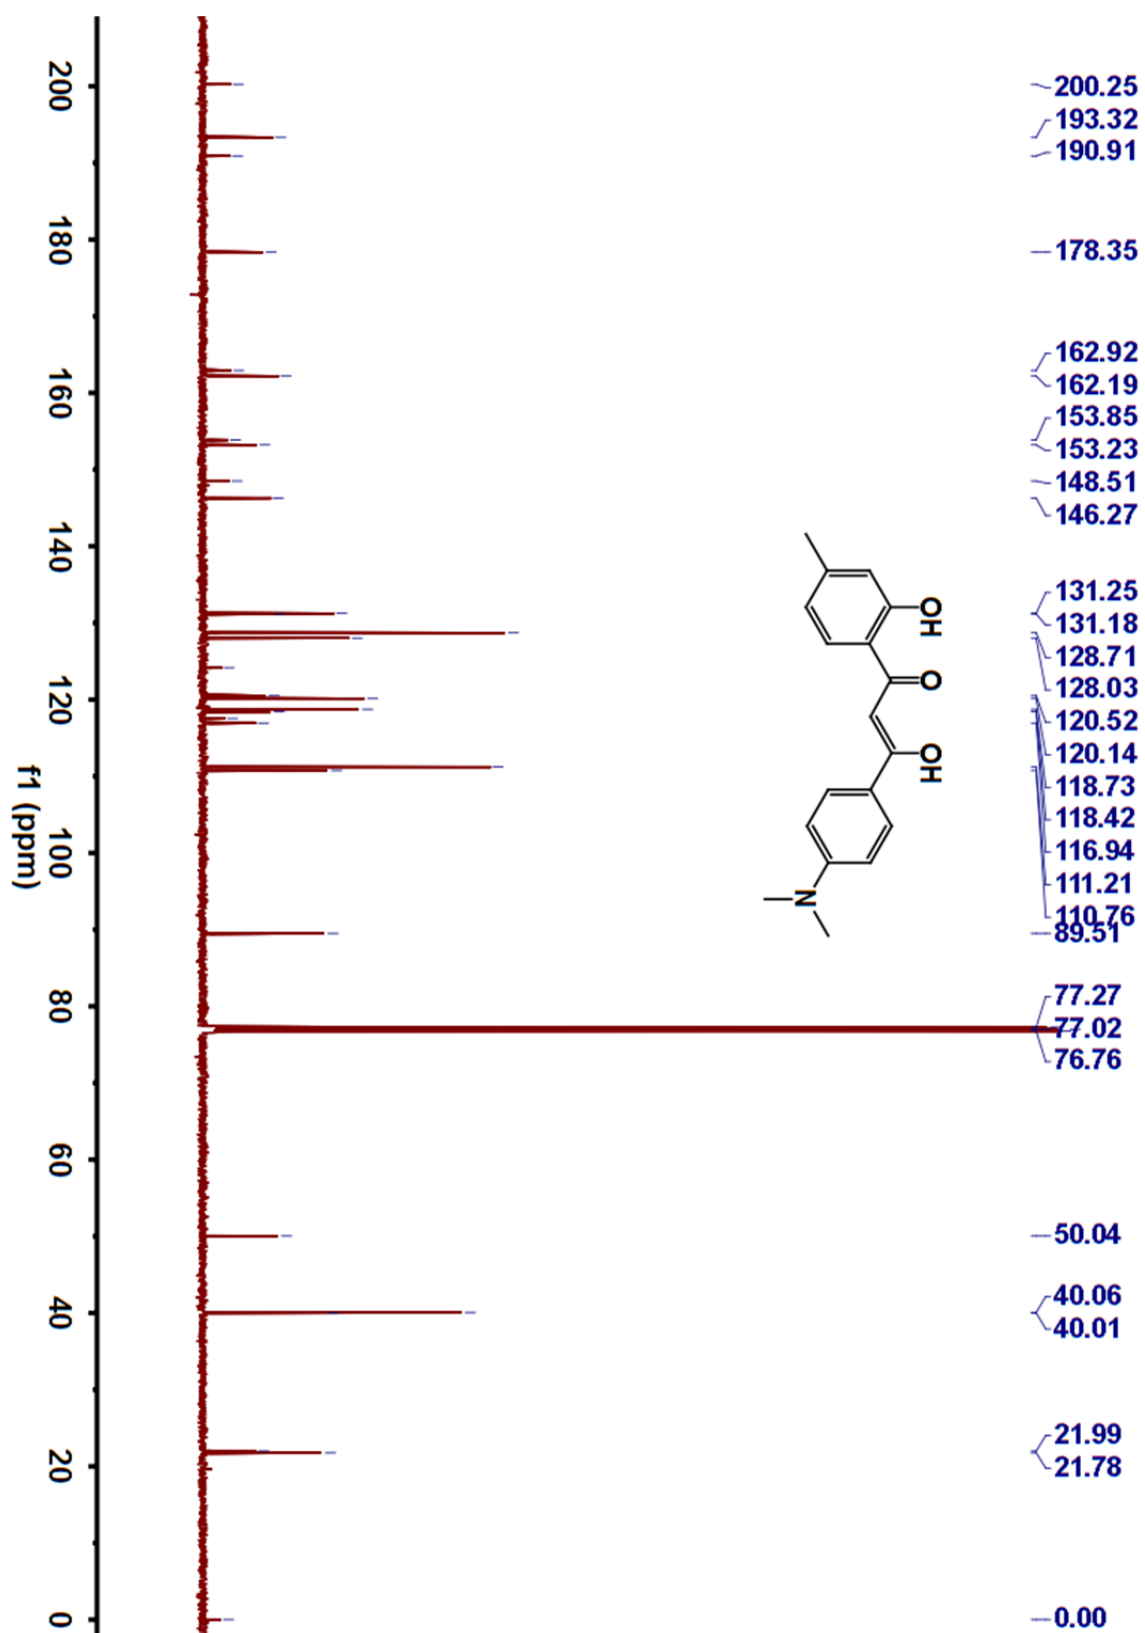

Figure S9.  $^{13}\text{C}$  spectra of **2** recorded in  $\text{CDCl}_3$  (125 MHz).

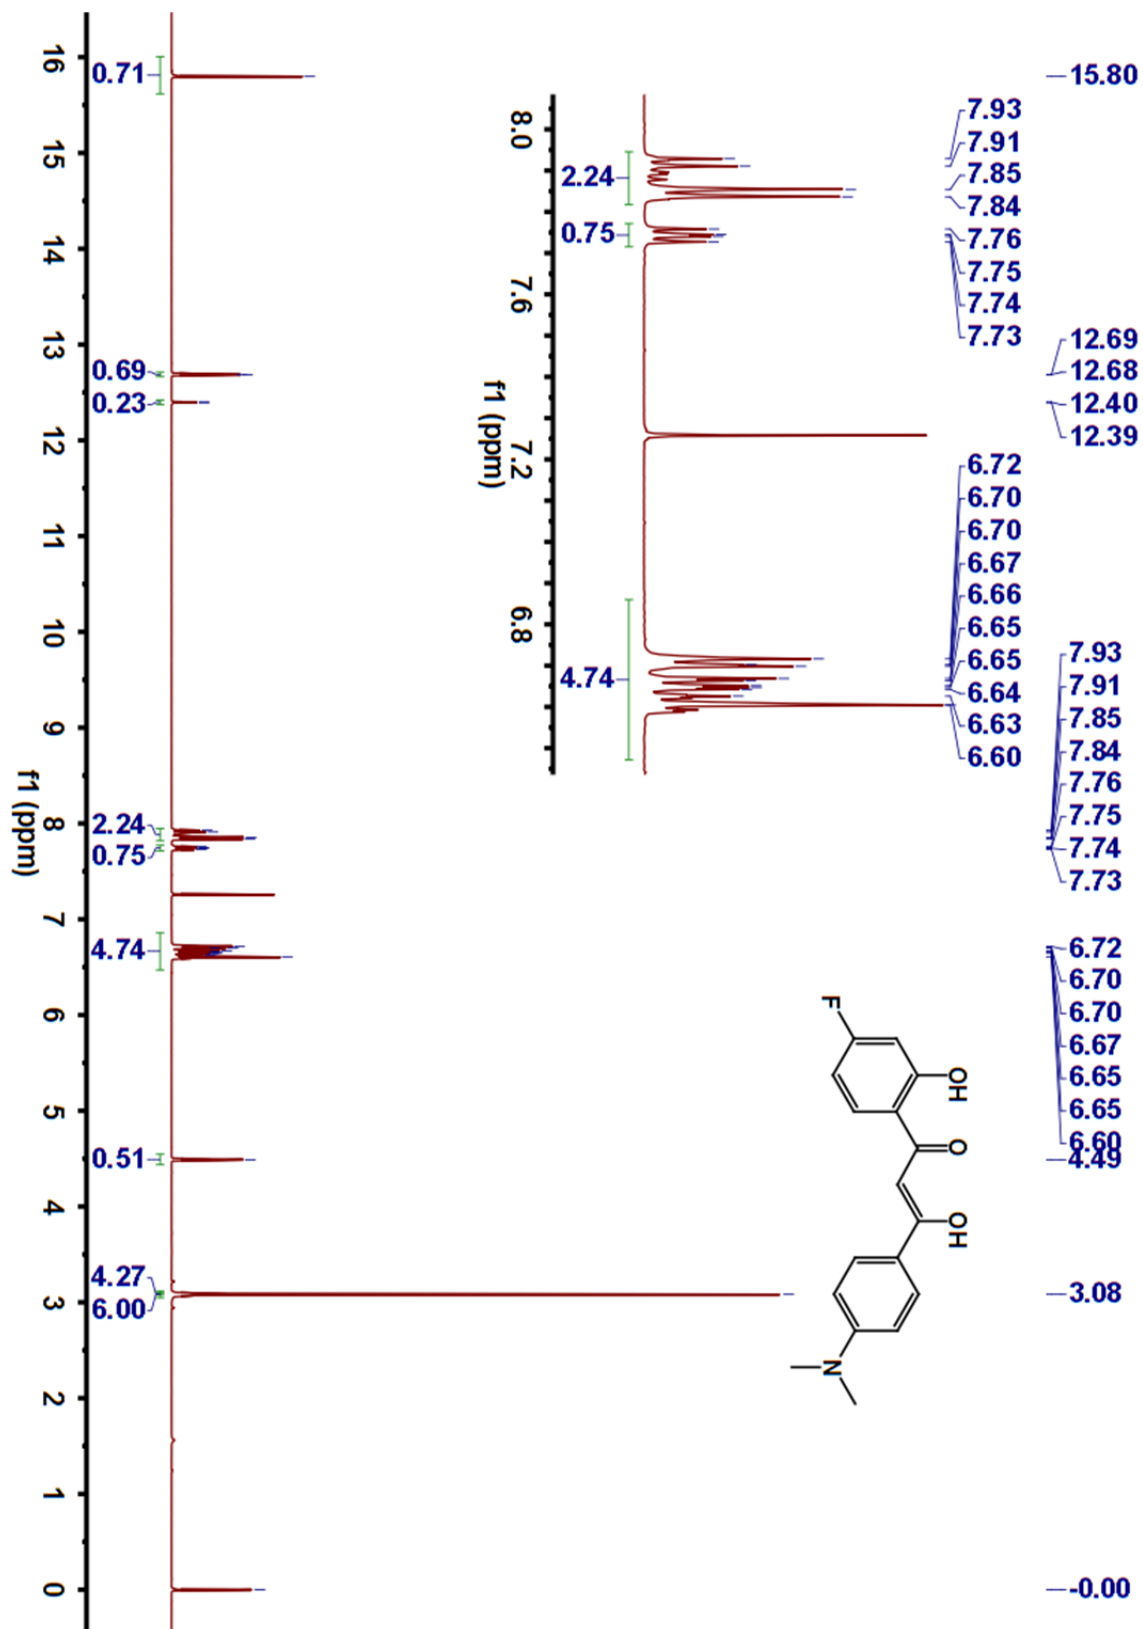

Figure S10.  $^1\text{H}$  spectra of **3** recorded in  $\text{CDCl}_3$  (500 MHz).

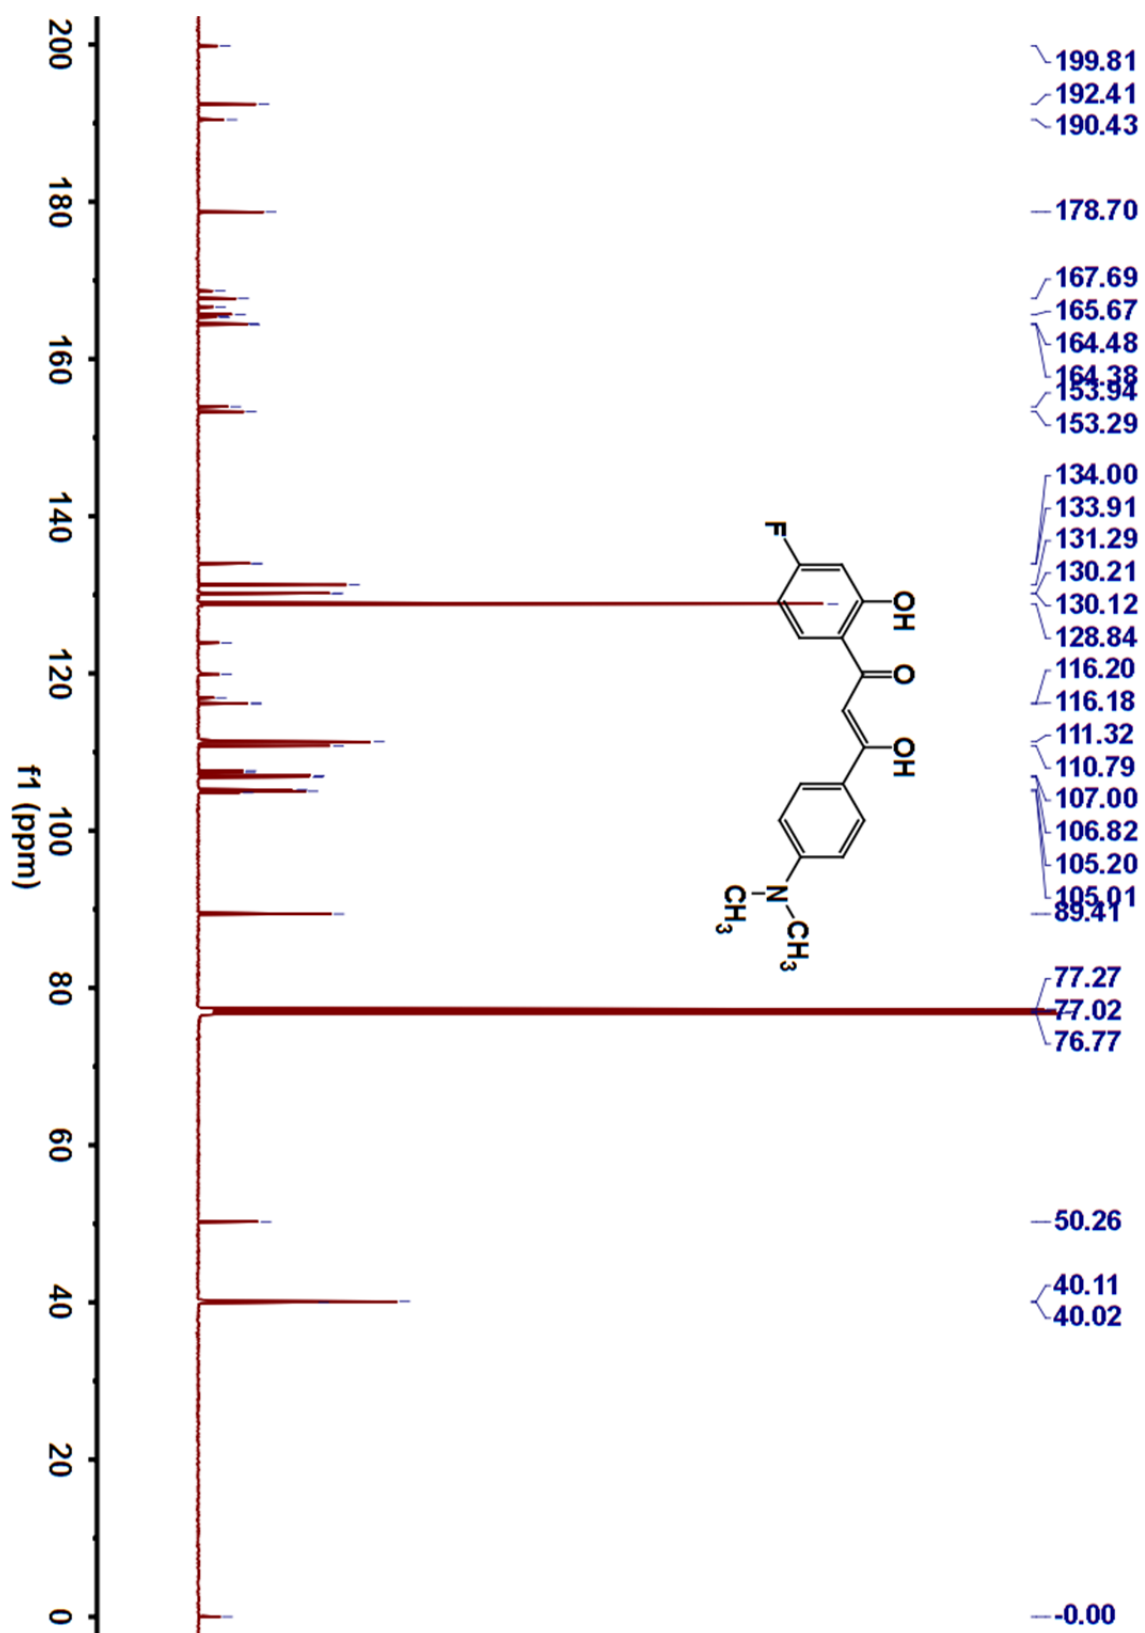

Figure S11.  $^{13}\text{C}$  spectra of **3** recorded in  $\text{CDCl}_3$  (125 MHz).

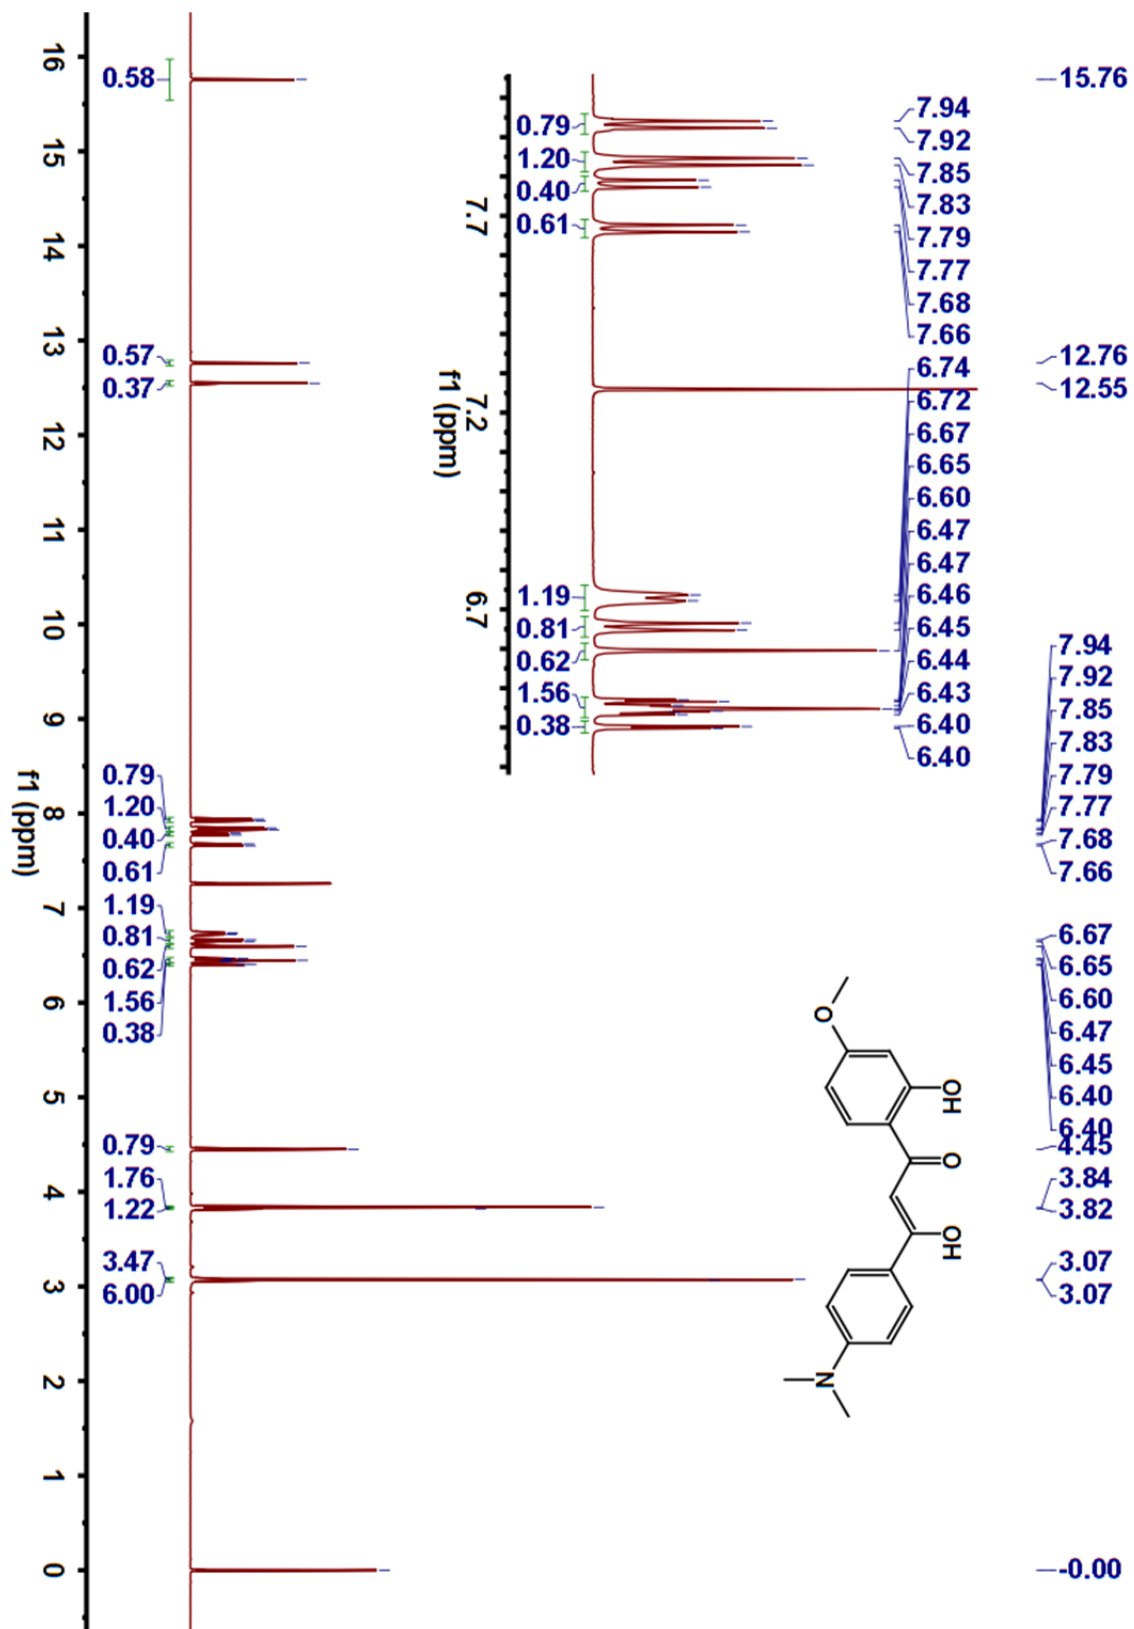

Figure S12.  $^1\text{H}$  spectra of **4** recorded in  $\text{CDCl}_3$  (500 MHz).



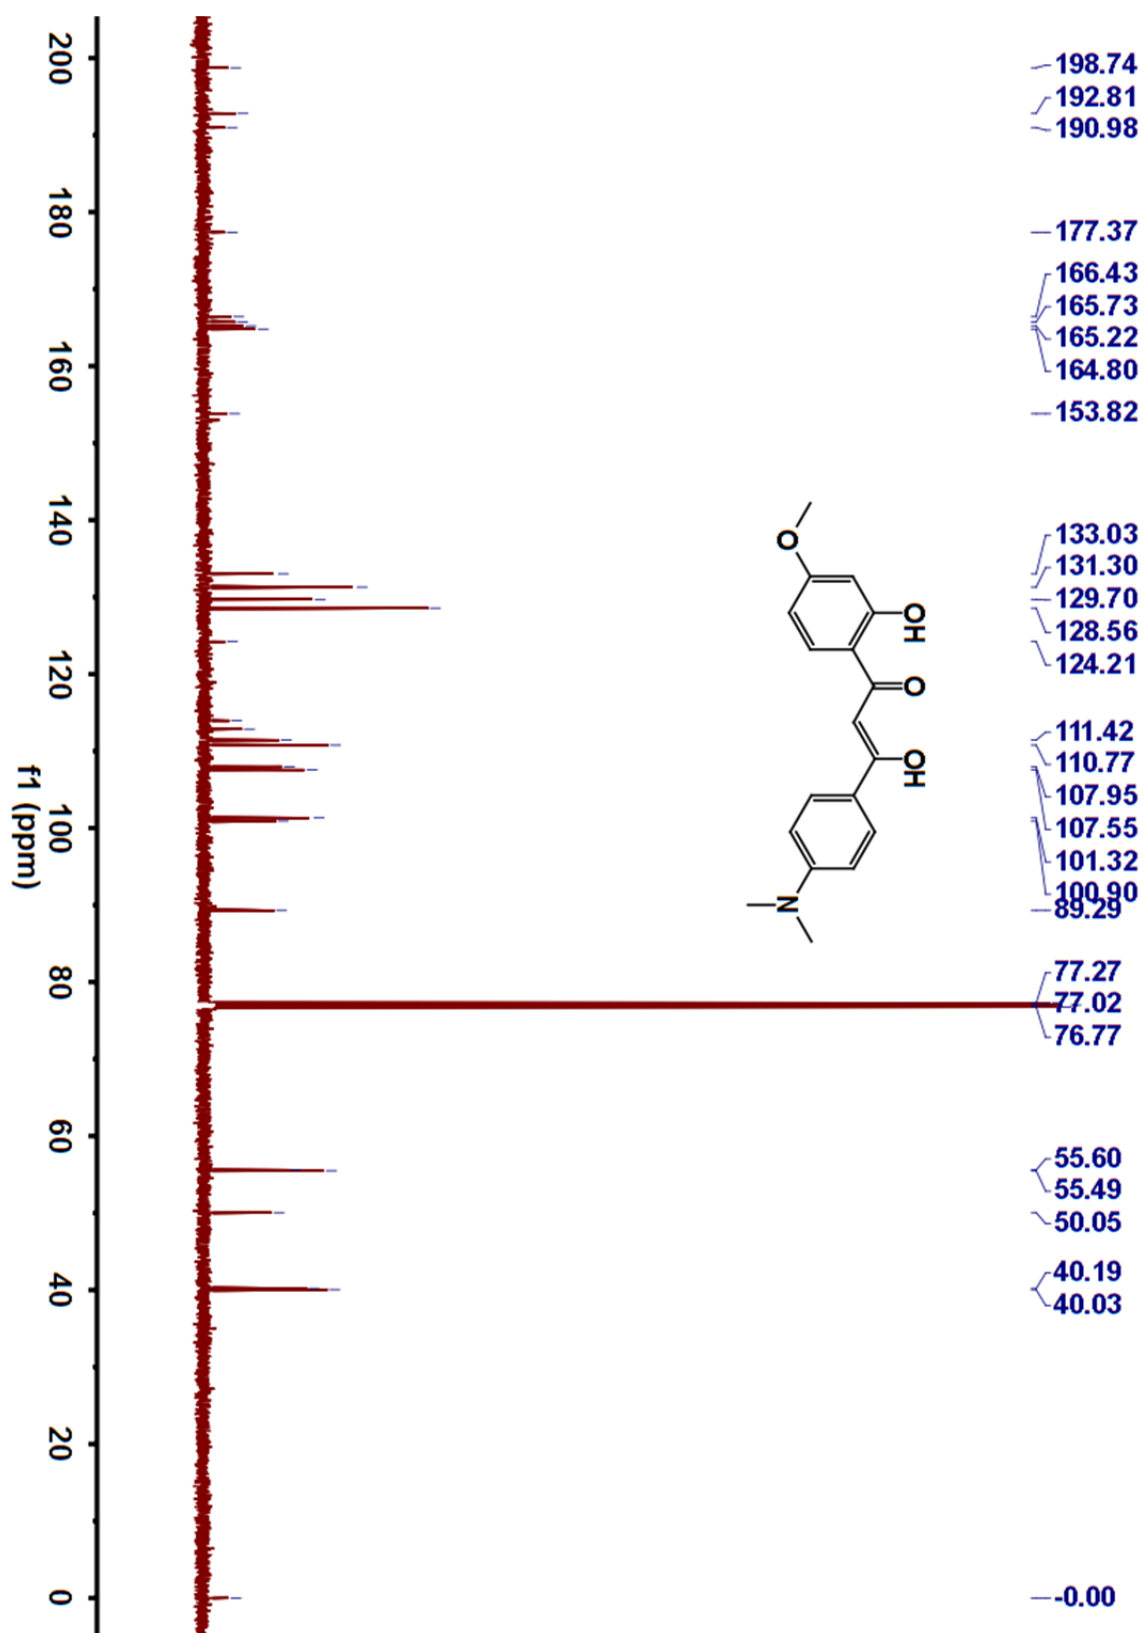

Figure S13.  $^{13}\text{C}$  spectra of 4 recorded in  $\text{CDCl}_3$  (125 MHz).

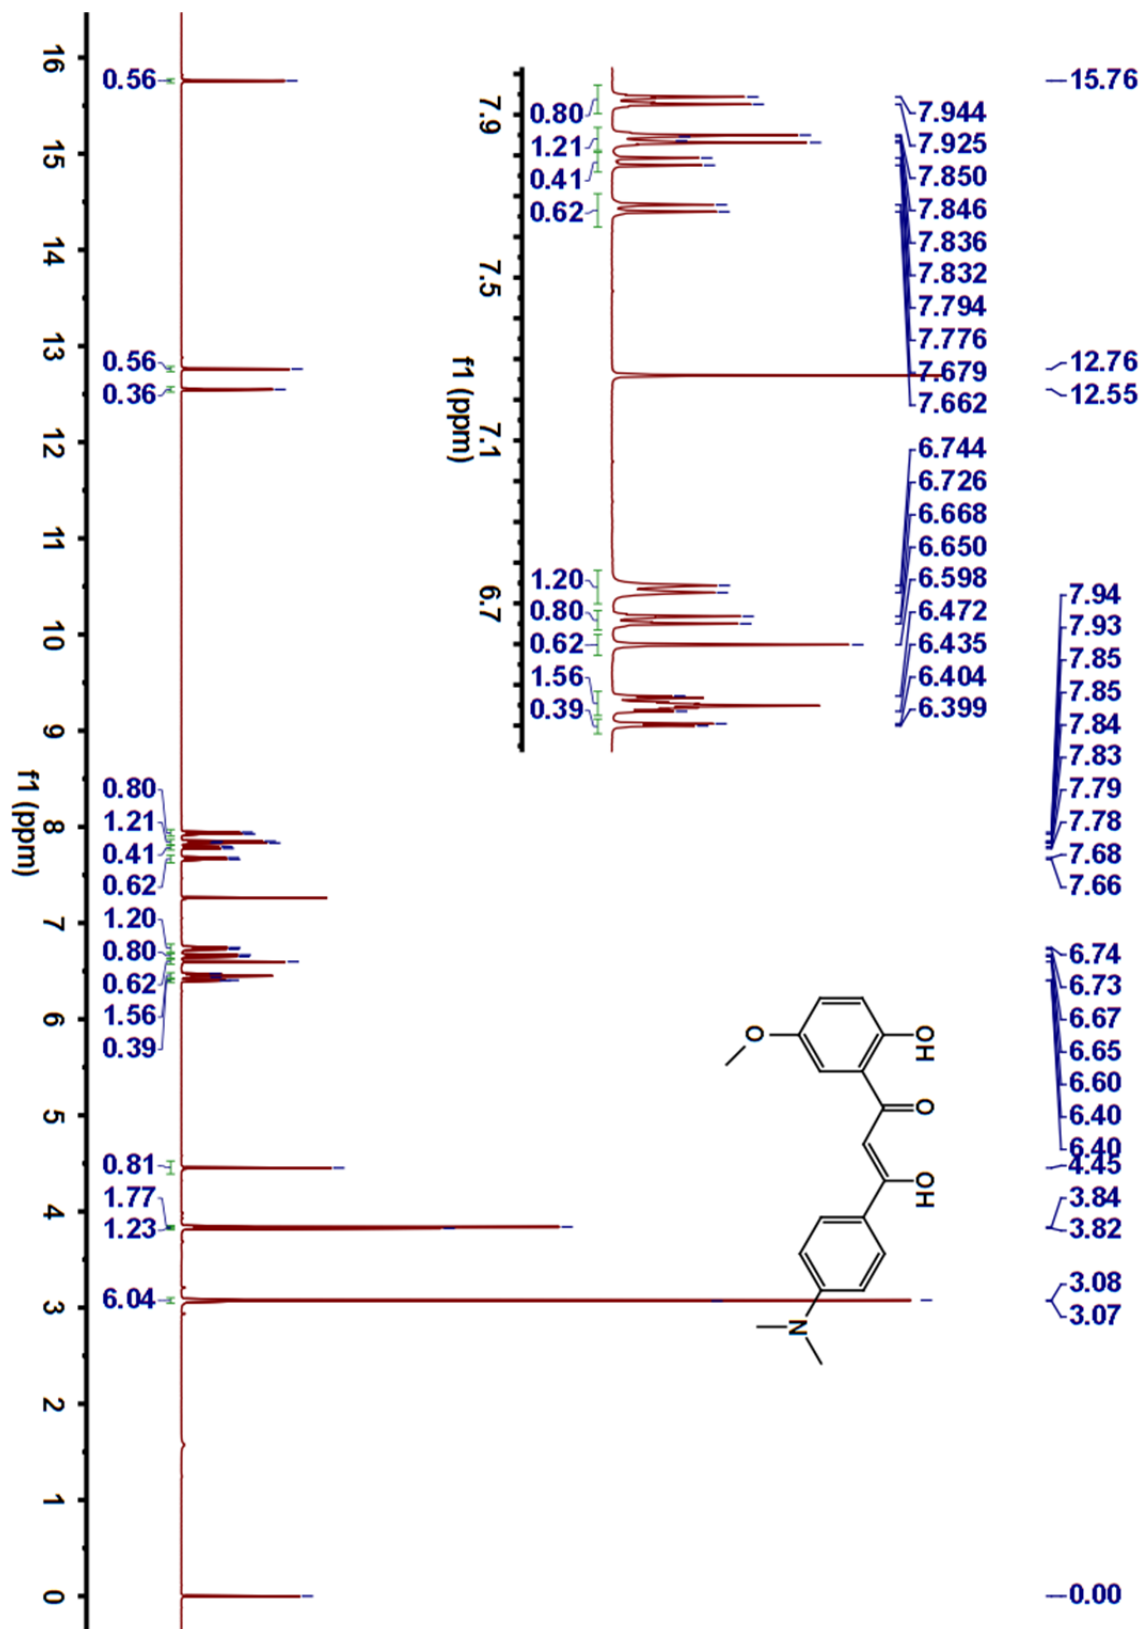

Figure S14.  $^1\text{H}$  spectra of **6** recorded in  $\text{CDCl}_3$  (500 MHz).

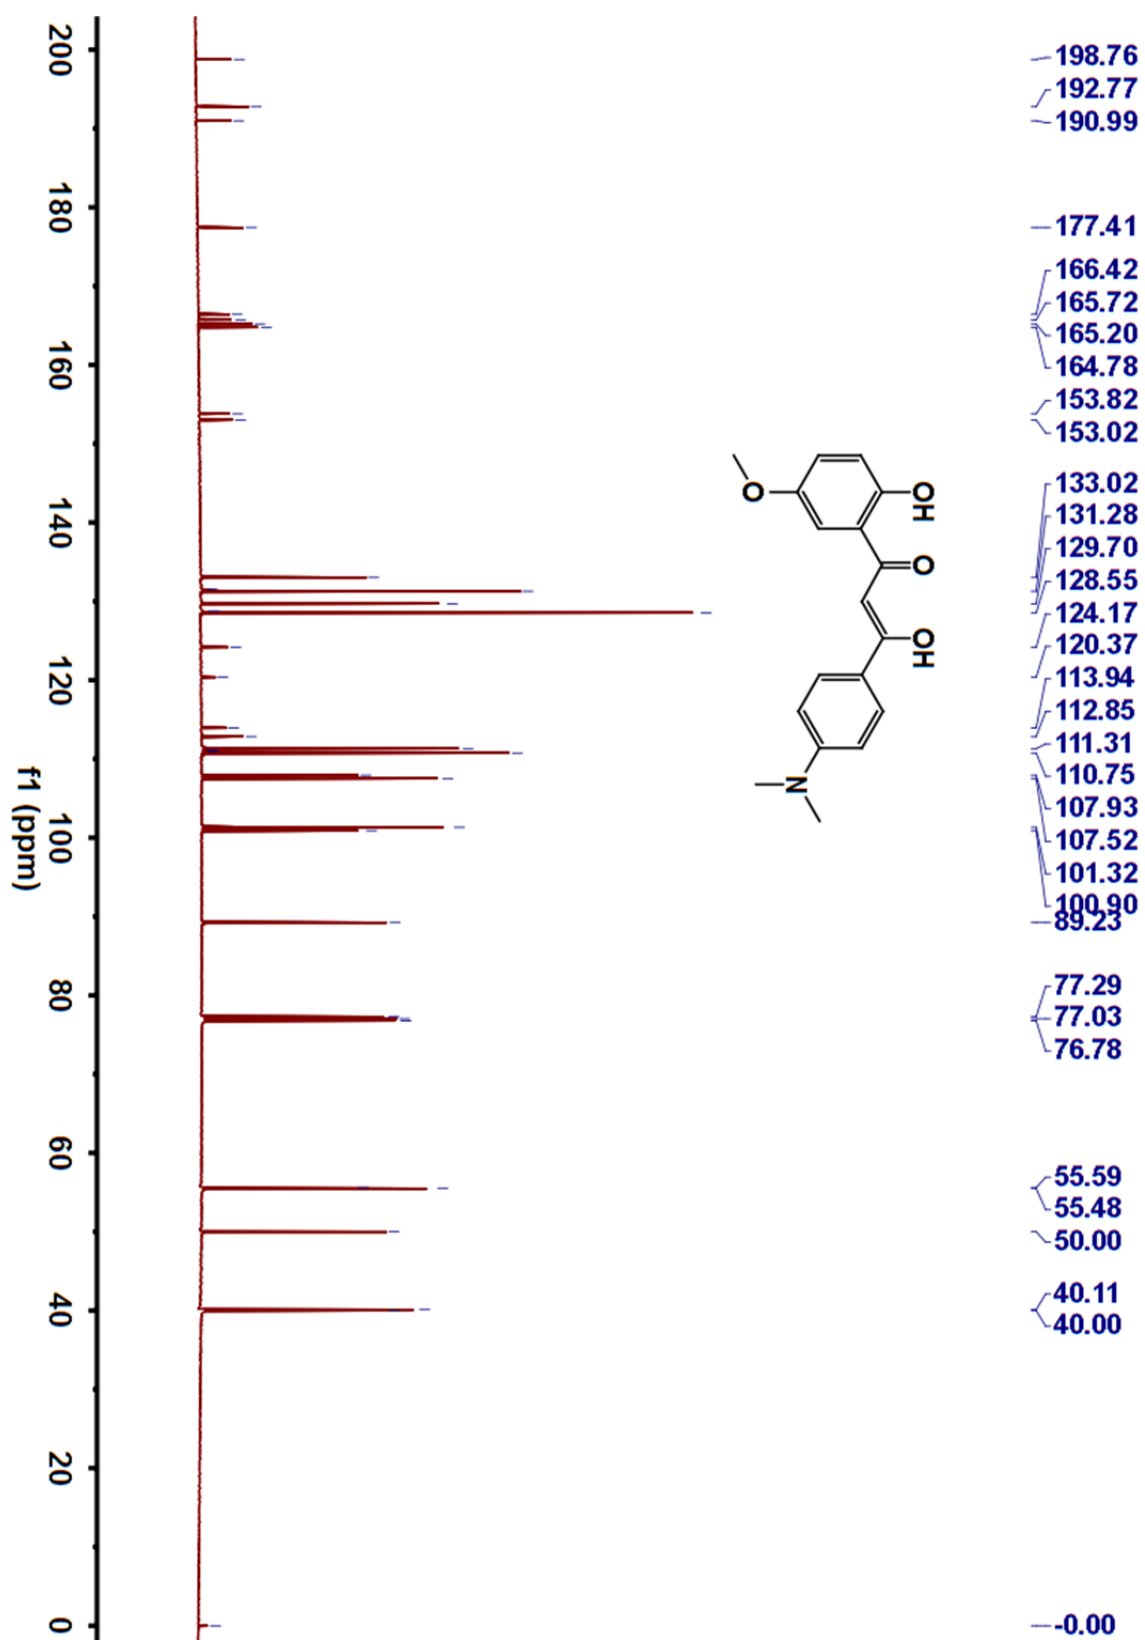

Figure S15.  $^{13}\text{C}$  spectra of 6 recorded in  $\text{CDCl}_3$  (125 MHz).
